# Supplementary material for: Factors affecting in vitro regeneration in the model tree Populus trichocarpa I. Medium, environment, and hormone controls on organogenesis
Source: Springer Nature journal article supplement (doi:10.1007/s11627-022-10301-9), 2022-11-21
Supplement: MOESM1 [file 11627_2022_10301_MOESM1_ESM.zip]

## Sheet: Sheet1
Table S3. Treatment means and medium compositions.
Experiment ID	Working ID	Treatment	Proportion of callus			Average size of callus			Proportion of shoot			Average number of shoot			Proportion of root			Average number of root
			Leaf	Petiole	Stem	Leaf	Petiole	Stem	Leaf	Petiole	Stem	Leaf	Petiole	Stem	Leaf	Petiole	Stem	Leaf	Petiole	Stem
E1 (in vivo)	1	1 (indirect)	0.892398	0.819345					0.454926	0.385923					0.470546	0.0872598
		2 (direct)	0.0890079	0.188373					0.0721825	0.228889					NA	NA
E2 (in vitro)	2	3 (BM1)	0.9375	0.916667	1	1.5	1.25	2.1875	0.4375	0.25	0.6875	0.9375	0.5	1.75	1	0.666667	0.8125	2.875	1	1.125
		4 (BM2)	1	1	1	1.375	1.58333	2.4375	0.25	0.416667	0.6875	0.375	1.16667	1.875	1	0.916667	0.75	2.5625	1.41667	1.0625
		5 (BM3)	1	1	1	1.8125	1.25	2.125	0.4375	0.583333	0.3125	1.0625	1.5	0.75	0.9375	0.833333	0.4375	2.625	1	0.625
		6 (BM4)	0.875	1	1	1.4375	1.66667	2.375	0.4375	0.5	0.25	0.6875	1.75	0.375	0.875	0.75	0.375	2.4375	1.66667	0.625
		7 (BM5)	0.9375	1	1	1.5625	1.25	1.875	0.5	0.333333	0.5	0.875	0.833333	1.1875	0.9375	0.75	0.375	2.25	0.916667	0.375
		8 (BM6)	1	0.916667	1	1.625	1.33333	2.4375	0.5	0.333333	0.625	0.9375	0.666667	1.25	0.9375	0.833333	0.5625	2.5625	1.41667	0.875
		9 (BM7)	1	1	1	1.625	1.25	2.125	0.4375	0.166667	0.1875	0.5	0.583333	0.25	1	0.666667	0.5	2.9375	1.25	0.8125
		10 (BM8)	1	0.916667	1	1.4375	1.33333	2.375	0.375	0.416667	0.25	0.5	1.33333	0.5	1	0.5	0.25	2.625	0.833333	0.375
		11 (BM9)	1	0.916667	1	1.875	1.5	2.3125	0.25	0.5	0.6875	0.3125	1.25	1.1875	1	0.333333	0.375	2.5	0.416667	0.4375
		12 (BM10)	1	0.916667	1	1.625	1.08333	1.6875	0.375	0.25	0.3125	1.0625	0.666667	1	1	0.75	0.125	2.5625	1.08333	0.1875
		13 (BM11)	1	0.833333	1	1.5	1.25	1.5625	0.875	0.333333	0.8125	2	0.416667	2.3125	0.9375	0.583333	0.375	2.3125	0.583333	0.5625
		14 (BM12)	1	1	1	1.625	1.41667	2.1875	0.5625	0.333333	0.3125	1.75	0.666667	0.5	1	0.333333	0.1875	2.5	0.333333	0.25
		15 (BM13)	1	1	0.9375	1.6875	1.41667	1.75	0.875	0.166667	0.25	2	0.583333	0.375	1	0.916667	0.3125	2.8125	1.41667	0.5
		16 (BM14)	1	1	0.9375	1.6875	1.66667	2.1875	0.625	0.416667	0.3125	1.25	1.25	0.4375	1	0.75	0.3125	2.875	1.08333	0.4375
		17 (BM15)	0.875	0.916667	0.9375	1.5	1.41667	2.3125	0.1875	0.0833333	0.3125	0.375	0.166667	0.375	1	0.583333	0.375	2.375	0.833333	0.5625
		18 (BM16)	1	0.666667	1	1.625	1	2.25	0.5	0.416667	0.0625	0.875	0.75	0.125	1	0.5	0.4375	2.75	0.666667	0.875
		19 (BM17)	1	1	1	1.75	1.5	1.9375	0.375	0.25	0.4375	0.9375	0.666667	0.9375	1	0.333333	0.0625	2.625	0.583333	0.0625
		20 (BM18)	1	0.916667	1	1.6875	1.5	2.125	0.25	0.416667	0.125	0.8125	0.916667	0.3125	0.9375	0.416667	0.375	2.0625	0.5	0.6875
		21 (BM19)	1	0.916667	0.875	1.375	1.08333	1.6875	0.625	0.583333	0.625	1.3125	2	2.3125	0.9375	0.5	0.3125	2.125	0.583333	0.4375
		22 (BM20)	1	0.833333	0.875	1.4375	1	1.4375	0.6875	0.25	0.5	1	0.583333	1.125	1	0.416667	0.1875	2.8125	0.416667	0.1875
		23 (BM21)	1	0.833333	0.875	1.375	0.916667	1.0625	0.5	0.222222	0.166667	0.916667	0.888889	0.25	1	0.583333	0	2.1875	0.583333	0
		24 (BM22)	1	0.916667	0.9375	1.1875	1.08333	1.5625	0.75	0.583333	0.4375	1.375	1.58333	1.0625	0.875	0.75	0.3125	2.3125	0.75	0.3125
		25 (BM23)	0.875	0.916667	0.9375	1.25	1.25	2	0.583333	0.555556	0.583333	2	1.22222	1.33333	1	0.666667	0.3125	2.625	0.666667	0.375
		26 (BM24)	1	1	1	1.5625	1.5	1.9375	0.5625	0.416667	0.375	1.125	0.916667	1.4375	1	0.5	0.25	2.8125	1	0.4375
		27 (BM25)	0.9375	0.916667	0.9375	1.375	1.33333	1.375	0.5	0.5	0.3125	1.0625	0.916667	0.8125	0.9375	0.416667	0.3125	2.6875	0.583333	0.375
		28 (BM26)	1	0.916667	1	1.5625	1.33333	1.6875	0.375	0.333333	0.4375	1	1	0.875	1	0.0833333	0.5	2.875	0.0833333	0.625
		29 (BM27)	1	0.916667	1	1.4375	1.33333	1.6875	0.3125	0.25	0.3125	0.5625	0.75	0.5	0.9375	0.583333	0.375	2.6875	0.75	0.4375
		30 (BM28)	1	0.916667	1	1.3125	1.41667	1.375	0.4375	0.5	0.6875	0.6875	1.25	2.625	0.875	0.333333	0.1875	1.5625	0.333333	0.1875
		31 (BM29)	0.875	0.833333	0.875	1.125	1	1.1875	0.375	0.333333	0.25	0.5	1.33333	0.375	0.5	0	0	0.9375	0	0
		32 (BM30)	0.9375	0.75	0.8125	1.25	1.08333	1.3125	0.375	0.166667	0.1875	0.4375	0.583333	0.3125	0.8125	0.25	0.125	1.625	0.416667	0.1875
		33 (BM31)	0.9375	0.75	0.8125	1.25	1.16667	1.1875	0.3125	0.5	0.1875	1.1875	1	0.3125	1	0.25	0.1875	2.5	0.333333	0.25
		34 (BM32)	1	0.833333	0.9375	1.5	1.33333	1.25	0.4375	0.333333	0.3125	0.6875	0.5	0.3125	0.6875	0.333333	0.125	1.5	0.416667	0.1875
		35 (BM33)	1	0.916667	0.875	1.5625	1.08333	1.125	0.25	0.166667	0.1875	0.5625	0.416667	0.1875	1	0.166667	0.125	2.3125	0.166667	0.1875
		36 (BM34)	1	0.916667	0.9375	1.125	1.25	1.375	0.125	0.0833333	0.4375	0.125	0.333333	0.625	1	0.166667	0.1875	2.625	0.166667	0.375
		37 (BM35)	0.9375	1	0.875	1.3125	1.25	1.25	0.1875	0.0833333	0.5625	0.25	0.25	1.3125	0.875	0.333333	0.1875	2.0625	0.333333	0.25
		38 (BM36)	0.9375	0.833333	0.8125	1.3125	0.833333	1.0625	0.333333	0.444444	0.583333	0.416667	1.44444	0.916667	0.8125	0.166667	0.0625	1.375	0.166667	0.0625
E3 (in vitro)	4	39 (BM11)	0.625	0.583333	0.736111	0.680556	0.625	1.20833	0.194444	0.277778	0.444444	1.77778	3.625	3.69444	0.819444	0.333333	0.148148	2.20833	0.458333	0.25
		40 (BM19)	0.402778	0.402778	0.708333	0.444444	0.416667	1	0.236111	0.263889	0.347222	1.69444	2.47222	3.56944	0.708333	0.180556	0.111111	1.56944	0.222222	0.111111
		41 (BM23)	0.555556	0.444444	0.833333	0.680556	0.458333	1.22222	0.0833333	0.111111	0.25	0.347222	1.20833	2.45833	0.777778	0.263889	0.152778	1.75	0.305556	0.222222
		42 (BM24)	0.666667	0.541667	0.805556	0.861111	0.541667	1.13889	0.152778	0.111111	0.305556	0.847222	1.20833	2.26389	0.777778	0.180556	0.166667	1.97222	0.180556	0.25
		43 (BM28)	0.486111	0.486111	0.805556	0.5	0.5	1.06944	0.152778	0.277778	0.375	1.22222	4.02778	4.68056	0.638889	0.152778	0.125	1.18056	0.166667	0.208333
E3 (in vivo)	3	44 (BM11)	0.736111	0.666667	0.958333	0.925926	0.75	2.29167	0.203125	0.176471	0.352941	0.546875	0.367647	0.955882	0.361111	0.0277778	0.375	0.680556	0.0416667	0.625
		45 (BM19)	0.677083	0.59375	0.9375	0.817708	0.625	1.95312	0.196429	0.326923	0.5	0.410714	0.730769	1.2	0.125	0.015625	0.34375	0.21875	0.015625	0.5625
		46 (BM23)	0.647059	0.573529	0.955882	0.838235	0.602941	2	0.09375	0.15625	0.279412	0.109375	0.28125	0.691176	0.308824	0	0.147059	0.588235	0	0.161765
		47 (BM24)	0.685185	0.472222	0.944444	0.824074	0.833333	2.02778	0.0441176	0.194444	0.388889	0.0588235	0.333333	0.888889	0.319444	0	0.166667	0.5	0	0.208333
		48 (BM28)	0.552083	0.402778	0.861111	0.630208	0.444444	1.30556	0.078125	0.25	0.361111	0.21875	0.555556	1	0.138889	0	0.0555556	0.152778	0	0.0555556
E4 (in vitro)	5	49 (BM19 - 1.5%)	0.46875	0.4375	0.53125	0.46875	0.4375	0.53125	0.03125	0.03125	0.03125	0.0625	0.25	0.03125	0.5625	0.25	0.09375	0.96875	0.25	0.09375
		50 (BM19 - 2.0%)	0.53125	0.4375	0.65625	0.625	0.4375	0.84375	0.0625	0.0625	0.1875	0.09375	0.09375	1.4375	0.65625	0.25	0.21875	1.1875	0.25	0.21875
		51 (BM19 - 2.5%)	0.28125	0.40625	0.625	0.28125	0.40625	0.78125	0.09375	0.3125	0.40625	0.5625	1.75	3.1875	0.53125	0.25	0.21875	1.03125	0.25	0.21875
		52 (BM19 - 3.0%)	0.46875	0.40625	0.75	0.53125	0.40625	0.84375	0.25	0.46875	0.46875	2.0625	4.40625	8.28125	0.53125	0.3125	0.1875	0.875	0.3125	0.1875
		53 (BM23 - 1.5%)	0.3125	0.53125	0.59375	0.40625	0.53125	0.6875	0	0	0	0	0	0	0.5625	0.15625	0.03125	0.8125	0.15625	0.03125
		54 (BM23 - 2.0%)	0.34375	0.4375	0.625	0.34375	0.4375	0.8125	0.09375	0.0625	0.21875	0.4375	0.3125	0.90625	0.375	0.09375	0	0.71875	0.09375	0
		55 (BM23 - 2.5%)	0.53125	0.53125	0.78125	0.6875	0.53125	0.96875	0.0625	0.25	0.34375	0.15625	2.25	2.53125	0.46875	0.03125	0.03125	0.875	0.03125	0.03125
		56 (BM23 - 3.0%)	0.34375	0.5	0.625	0.375	0.5	0.90625	0.21875	0.21875	0.40625	0.84375	1.53125	4.90625	0.46875	0.125	0.125	1.09375	0.1875	0.125
E5 (in vitro)	7	57 (D0, BM19, 2,4D - 0)	0	0	0	0	0	0	0	0.025	0.05	0	0.05	0.575	0.0454545	0	0	0.0681818	0	0
		58 (D1, BM19, 2,4D - 0.01)	0.0416667	0.0416667	0.270833	0.0416667	0.0416667	0.270833	0.0625	0.25	0.4375	0.270833	3.47917	8.10417	0.208333	0	0.0208333	0.3125	0	0.0208333
		59 (D2, BM19, 2,4D - 0.05)	0.520833	0.416667	0.979167	0.541667	0.541667	1.97917	0.104167	0.458333	0.0625	0.979167	5.85417	1.08333	0.395833	0.125	0.0416667	0.708333	0.125	0.0416667
		60 (D3BM19, 2,4D - 0.1)	0.645833	0.854167	1	1	1.35417	1.89583	0.104167	0.104167	0	0.833333	1.25	0	0.5	0.0416667	0.0208333	0.8125	0.0416667	0.0208333
		61 (D4, BM19, 2,4D - 0.5)	0.9375	0.979167	1	2.20833	1.75	1.60417	0	0	0	0	0	0	0	0	0	0	0	0
		62 (N1, BM19, NAA - 0.1)	0.625	1	1	0.729167	1.60417	1.70833	0.208333	0.166667	0	1.79167	2.375	0	0.770833	0.145833	0.0416667	1.66667	0.145833	0.0625
		63 (N2, BM19, NAA - 0.5)	0.583333	1	1	0.833333	1.75	1.39583	0.1875	0.0208333	0	1.125	0.104167	0	0.729167	0.145833	0.0416667	1.9375	0.166667	0.0416667
		64 (N3, BM19, NAA - 1)	0.795455	1	1	1.52273	1.81818	1.20455	0.272727	0	0	2.68182	0	0	0.931818	0.113636	0.0227273	2.5	0.113636	0.0227273
		65 (N4, BM19, NAA - 2)	0.840909	0.931818	1	1.61364	1.56818	1.45455	0.340909	0.0227273	0	1.47727	0.0454545	0	0.840909	0.113636	0.0454545	2.36364	0.204545	0.0454545
		66 (D0, BM23, 2,4D - 0)	0	0	0	0	0	0	0.02	0	0.02	0.1	0	0.56	0.08	0	0	0.1	0	0
		67 (D1, BM23, 2,4D - 0.01)	0	0.02	0.35	0	0.02	0.38	0.08	0.25	0.44	0.54	3.19	6.98	0.17	0.02	0	0.17	0.02	0
		68 (D2, BM23, 2,4D - 0.05)	0.4	0.38	0.96	0.42	0.5	2	0.04	0.31	0.04	0.56	5.58	0.63	0.35	0.19	0.02	0.44	0.23	0.02
		69 (D3, BM23, 2,4D - 0.1)	0.73	0.9	1	0.94	1.75	2.08	0.13	0.13	0.02	0.56	1.75	0.58	0.5	0.1	0	0.71	0.13	0
		70 (D4, BM23, 2,4D - 0.5)	0.9	1	1	2.35	2.31	2	0	0	0	0	0	0	0.02	0	0	0.02	0	0
		71 (N1, BM23, NAA - 0.1)	0.71	1	1	0.9	1.58	1.96	0.25	0.04	0	2.92	0.1	0	0.79	0.33	0.08	1.54	0.38	0.08
		72 (N2, BM23, NAA - 0.5)	0.83	1	1	1.33	2.15	1.71	0.21	0.02	0.02	0.9	0.08	0.02	0.85	0.1	0.02	2.13	0.13	0.02
		73 (N3, BM23, NAA - 1)	0.92	0.98	1	1.56	2.04	1.56	0.15	0	0.02	0.77	0	0.1	0.96	0.15	0	2.48	0.25	0
		74 (N4, BM23, NAA - 2)	0.9	0.98	0.98	2	1.83	1.71	0.19	0.1	0.04	1.25	0.56	0.1	0.9	0.21	0	2.25	0.35	0
E5 (in vivo)	6	75 (D0, BM19, 2,4D - 0)	0.0592105	0.3125	0.51875	0.0592105	0.3125	0.6	0	0.2	0.65625	0	0.59375	2.80625	0	0	0	0	0	0
		76 (D1, BM19, 2,4D - 0.01)	0.0880952	0.360417	0.65625	0.0880952	0.360417	0.8125	0.05	0.5375	0.79375	0.075	2.13125	3.59375	0.00714286	0.0145833	0.075	0.00714286	0.0145833	0.0875
		77 (D2, BM19, 2,4D - 0.05)	0.133772	0.639583	0.822917	0.173246	0.825	1.38958	0.14375	0.5375	0.73125	0.30625	2.21875	3.21875	0.0197368	0.0125	0.05	0.0197368	0.0125	0.0625
		78 (D3, BM19, 2,4D - 0.1)	0.30787	0.66875	0.75641	0.518519	1.21875	1.62821	0.05	0.30625	0.36875	0.075	1.0625	1.475	0.0208333	0.00625	0	0.0208333	0.00625	0
		79 (D4, BM19, 2,4D - 0.5)	0.565315	0.764583	0.8375	0.846847	1.4125	1.68125	0.0125	0.1125	0.2375	0.0625	0.3375	0.99375	0.00675676	0	0	0.00675676	0	0
		80 (N1, BM19, NAA - 0.1)	0.333333	0.65	0.808333	0.333333	0.933333	1.31667	0.0875	0.4125	0.64375	0.3125	1.425	2.45	0.222973	0.11875	0.33125	0.313063	0.1875	0.4875
		81 (N2, BM19, NAA - 0.5)	0.506579	0.71875	0.845833	0.758772	1.26458	1.82708	0.1125	0.24375	0.23125	0.28125	0.69375	0.7	0.291667	0.06875	0.16875	0.548246	0.075	0.29375
		82 (N3, BM19, NAA - 1)	0.621429	0.769737	0.904167	0.835714	1.4386	1.84583	0.1375	0.25625	0.29375	0.39375	0.70625	0.79375	0.278571	0.0986842	0.177083	0.664286	0.118421	0.345833
		83 (N4, BM19, NAA - 2)	0.70045	0.811966	0.852083	0.954955	1.50427	1.79167	0.1125	0.1375	0.15	0.20625	0.3375	0.31875	0.281532	0.0470085	0.125	0.524775	0.0641026	0.2125
E6 (in vivo)	8	84 (DB1, BM19, 2,4D - 0.01/BAP - 0.5)	0.275	0.613889	0.793103	0.3	0.672222	1.10345	0.133333	0.661458	0.827957	0.275	2.77865	4.48925	0	0	0	0	0	0
		85 (DB2, BM19, 2,4D - 0.05/BAP - 0.5)	0.603448	0.567204	0.85	0.678161	0.61828	1.18056	0.225	0.607527	0.622396	0.466667	2.2957	2.29167	0	0	0	0	0	0
		86 (DB3, BM19, 2,4D - 0.1/BAP - 0.5)	0.566667	0.586022	0.822581	0.658333	0.610215	1.15323	0.146552	0.575	0.454301	0.258621	1.63611	1.59409	0	0	0	0	0	0
		87 (DB4, BM19, 2,4D - 0.01/BAP - 1)	0.218391	0.327778	0.716667	0.244253	0.336111	0.913889	0.135057	0.634409	0.827957	0.301724	2.27957	4.42742	0	0	0	0	0	0
		88 (DB5, BM19, 2,4D - 0.05/BAP - 1)	0.45977	0.319444	0.702778	0.520115	0.352778	0.986111	0.114943	0.633333	0.58871	0.221264	2.12778	2.37903	0	0	0	0	0	0
		89 (DB6, BM19, 2,4D - 0.1/BAP - 1)	0.413889	0.311828	0.645161	0.438889	0.311828	0.774194	0.0517241	0.636111	0.6	0.0689655	2.05	1.95	0	0	0	0	0	0
		90 (DK1, BM19, 2,4D - 0.01/KIN - 0.5)	0.016129	0.309896	0.671875	0.0241935	0.372396	1.03125	0.0402299	0.583333	0.880556	0.0603448	2.34444	5.47778	0	0	0.0078125	0	0	0.0078125
		91 (DK2, BM19, 2,4D - 0.05/KIN - 0.5)	0.297222	0.578125	0.828125	0.366667	0.914062	1.6849	0.367816	0.791667	0.858333	0.882184	3.81944	4.41667	0.046875	0	0.046875	0.046875	0	0.0546875
		92 (DK3, BM19, 2,4D - 0.1/KIN - 0.5)	0.54023	0.717742	0.91129	0.905172	1.28495	1.99194	0.270833	0.827586	0.58046	0.794643	4.12931	2.58908	0.0268817	0	0.0483871	0.0268817	0	0.0483871
		93 (DK4, BM19, 2,4D - 0.01/KIN - 1)	0.058642	0.183333	0.516667	0.095679	0.216667	0.725	0.0524691	0.589286	0.892857	0.179012	1.91667	4.80952	0	0	0	0	0	0
		94 (DK5, BM19, 2,4D - 0.05/KIN - 1)	0.258621	0.454301	0.658602	0.390805	0.591398	1.11559	0.273333	0.755952	0.892857	0.886667	3.15774	4.875	0.0241935	0	0.0241935	0.0241935	0	0.0241935
		95 (DK6, BM19, 2,4D - 0.1/KIN - 1)	0.487179	0.605556	0.847222	0.846154	0.947222	1.83611	0.228395	0.819444	0.85	0.567901	3.79444	3.96944	0.0308642	0	0.00833333	0.0308642	0	0.00833333
		96 (DP1, BM19, 2,4D - 0.01/2IP - 0.5)	0.0568182	0.565217	0.757246	0.0568182	0.586957	1.01812	0.136364	0.386364	0.454545	0.340909	1.36364	2.20455	0	0	0	0	0	0
		97 (DP2, BM19, 2,4D - 0.05/2IP - 0.5)	0.600694	0.742754	0.892361	0.829861	1.02536	1.79167	0.1	0.675	0.45	0.275	2.475	1.275	0.197917	0.0108696	0.104167	0.270833	0.0108696	0.104167
		98 (DP3, BM19, 2,4D - 0.1/2IP - 0.5)	0.666667	0.826667	0.91	1.35145	1.42	2.07667	0.05	0.2	0.075	0.075	0.225	0.125	0.16	0.01	0.01	0.16	0.01	0.01
		99 (DP4, BM19, 2,4D - 0.01/2IP - 1)	0.0634921	0.670635	0.857143	0.0634921	0.718254	1.2381	0.1875	0.458333	0.625	0.5625	2.22917	3.41667	0	0	0	0	0	0
		100 (DP5, BM19, 2,4D - 0.05/2IP - 1)	0.583333	0.7375	0.908333	0.912281	1.06667	1.84583	0.175	0.475	0.45	0.6	1.975	1	0.25	0.0375	0.05	0.275	0.0375	0.05
		101 (DP6, BM19, 2,4D - 0.1/2IP - 1)	0.634058	0.836957	0.858696	1.23913	1.43478	2.06522	0.0416667	0.291667	0.0625	0.104167	0.770833	0.0833333	0.119565	0	0.0326087	0.119565	0	0.0326087
		102 (NB1, BM19, NAA - 0.5/BAP - 0.5)	0.336022	0.458333	0.757812	0.352151	0.458333	0.859375	0.193548	0.606771	0.546875	0.548387	1.76302	2.17969	0.0078125	0	0	0.0078125	0	0
		103 (NB2, BM19, NAA - 1/BAP - 0.5)	0.338889	0.442708	0.796875	0.363889	0.450521	0.992188	0.16129	0.554688	0.408854	0.370968	1.72396	1.36198	0.0234375	0	0	0.0234375	0	0
		104 (NB3, BM19, NAA - 2/BAP - 0.5)	0.346354	0.440104	0.726562	0.372396	0.440104	0.960938	0.16129	0.5	0.398438	0.354839	1.63281	1.07031	0.0078125	0	0	0.0078125	0	0
		105 (NB4, BM19, NAA - 0.5/BAP - 1)	0.263441	0.484375	0.742188	0.271505	0.484375	0.934896	0.112903	0.59375	0.578125	0.306452	2.01302	2.20312	0.0078125	0	0	0.0078125	0	0
		106 (NB5, BM19, NAA - 1/BAP - 1)	0.233333	0.390625	0.757812	0.233333	0.390625	0.867188	0.141667	0.591146	0.507812	0.325	1.7526	2.04688	0	0	0	0	0	0
		107 (NB6, BM19, NAA - 2/BAP - 1)	0.191667	0.306452	0.671875	0.191667	0.306452	0.773438	0.189655	0.466667	0.435484	0.413793	1.36944	1.3871	0	0	0	0	0	0
		108 (NK1, BM19, NAA - 0.5/KIN - 0.5)	0.182692	0.330729	0.635417	0.208333	0.401042	1.19271	0.0603448	0.375	0.341146	0.0948276	1.15365	1.16406	0.0703125	0	0.0859375	0.0703125	0	0.0859375
		109 (NK2, BM19, NAA - 1/KIN - 0.5)	0.37	0.34375	0.728495	0.41	0.484375	1.43548	0.0887097	0.328125	0.325521	0.290323	1.05208	0.796875	0.132812	0	0.078125	0.203125	0	0.0859375
		110 (NK3, BM19, NAA - 2/KIN - 0.5)	0.302469	0.352151	0.778646	0.348765	0.489247	1.38021	0.145062	0.30914	0.217742	0.385802	0.811828	0.483871	0.125	0.015625	0.0546875	0.195312	0.015625	0.0625
		111 (NK4, BM19, NAA - 0.5/KIN - 1)	0.224638	0.112903	0.569892	0.224638	0.129032	0.932796	0.11	0.438172	0.443548	0.256667	1.08065	1.53226	0.0403226	0	0.0806452	0.0403226	0	0.112903
		112 (NK5, BM19, NAA - 1/KIN - 1)	0.236667	0.172043	0.617188	0.236667	0.172043	1.13802	0.115385	0.403226	0.387097	0.298077	1.24462	1.16129	0.046875	0	0.046875	0.046875	0	0.0546875
		113 (NK6, BM19, NAA - 2/KIN - 1)	0.1875	0.182292	0.52957	0.1875	0.182292	0.938172	0.0982143	0.338542	0.302083	0.232143	1.05469	0.960938	0.03125	0	0.0390625	0.03125	0	0.0390625
		114 (NP1, BM19, NAA - 0.5/2IP - 0.5)	0.327957	0.460938	0.921875	0.336022	0.65625	1.84375	0.046875	0.252604	0.210938	0.117188	0.729167	0.453125	0.242188	0.0546875	0.21875	0.3125	0.0546875	0.34375
		115 (NP2, BM19, NAA - 1/2IP - 0.5)	0.268229	0.601562	0.947917	0.307292	0.734375	1.96615	0.046875	0.3125	0.242188	0.0625	0.976562	0.703125	0.140625	0.078125	0.203125	0.21875	0.0859375	0.28125
		116 (NP3, BM19, NAA - 2/2IP - 0.5)	0.317708	0.526042	0.942708	0.325521	0.677083	1.80729	0.0390625	0.09375	0.09375	0.0625	0.226562	0.171875	0.101562	0.0078125	0.140625	0.15625	0.0078125	0.242188
		117 (NP4, BM19, NAA - 0.5/2IP - 1)	0.393229	0.419271	0.929688	0.424479	0.5	2.01302	0.101562	0.382812	0.322917	0.195312	1.04948	0.794271	0.273438	0.046875	0.257812	0.429688	0.046875	0.367188
		118 (NP5, BM19, NAA - 1/2IP - 1)	0.319444	0.408602	0.873656	0.355556	0.537634	1.66935	0.0322581	0.266129	0.209677	0.0403226	0.556452	0.467742	0.193548	0.0241935	0.169355	0.282258	0.0241935	0.233871
		119 (NP6, BM19, NAA - 2/2IP - 1)	0.430108	0.424479	0.869792	0.497312	0.510417	1.76823	0.0546875	0.195312	0.132812	0.15625	0.390625	0.296875	0.15625	0.0234375	0.179688	0.273438	0.0234375	0.226562
E7 (in vivo)	9	120 (M0)	0.294271	0.451389	0.803241	0.341146	0.578704	1.41667	0.241667	0.566176	0.583333	0.613889	1.88725	2.16905	0.0530303	0	0.0486111	0.0757576	0	0.0555556
		121 (M50)	0.213889	0.384259	0.729167	0.222222	0.458333	1.15278	0.137821	0.382812	0.273438	0.352564	0.973958	0.911458	0.00757576	0	0.00694444	0.00757576	0	0.00694444
		122 (M100)	0.078125	0.30787	0.55787	0.078125	0.342593	0.87037	0.104167	0.166667	0.169118	0.220238	0.525253	0.441176	0	0.00694444	0.00694444	0	0.00694444	0.00694444
		123 (M200)	0.0694444	0.210648	0.554054	0.0694444	0.210648	0.846847	0.0357143	0.0651042	0.078125	0.0357143	0.111979	0.1875	0.00757576	0	0.00675676	0.00757576	0	0.00675676
		124 (S50)	0.195312	0.468137	0.795238	0.203125	0.661765	1.44286	0.15	0.375	0.328431	0.383333	0.977941	1.10784	0.00735294	0	0.0357143	0.00735294	0	0.0357143
		125 (S100)	0.0909091	0.239035	0.60307	0.0909091	0.287281	1.03509	0.0967742	0.269608	0.257353	0.258065	0.642157	0.791667	0.00735294	0	0	0.00735294	0	0
		126 (S200)	0	0.120614	0.448198	0	0.120614	0.682432	0	0.0686275	0.0833333	0	0.0759804	0.166667	0	0	0.00657895	0	0	0.00657895
		127 (M100 - S100)	0.0416667	0.197368	0.460526	0.0490196	0.243421	0.701754	0	0.0588235	0.0441176	0	0.139706	0.102941	0	0	0.00657895	0	0	0.00657895
E8 (in vivo)	10	128 (Fluorescent, B0 - P0)	0.344444	0.211111	0.8	0.361111	0.305556	1.35	0.0555556	0.192308	0.428571	0.111111	0.634615	1.66071	0	0	0.0222222	0	0	0.0222222
		129 (Fluorescent, B - 5)	0.361111	0.177083	0.645833	0.377778	0.208333	0.989583	0.0166667	0.0208333	0.383333	0.0333333	0.0625	2.13333	0	0	0.0625	0	0	0.0625
		130 (Fluorescent, B - 25)	0.375	0.171875	0.729167	0.375	0.541667	1.28646	0.0178571	0.047619	0.4	0.0892857	0.166667	1.47778	0	0	0	0	0	0
		131 (Fluorescent, B - 50)	0.28125	0.171875	0.583333	0.328125	0.203125	0.859375	0	0.0714286	0.136905	0	0.321429	0.64881	0	0	0.015625	0	0	0.015625
		132 (Fluorescent, P - 0.5)	0.234375	0.234375	0.776042	0.28125	0.270833	1.22396	0.05	0.0833333	0.716667	0.116667	0.154762	2.97778	0	0	0.0625	0	0	0.078125
		133 (Fluorescent, P - 1)	0.3	0.269231	0.833333	0.333333	0.288462	1.21875	0	0.0416667	0.385417	0	0.0416667	1.55208	0	0	0.046875	0	0	0.046875
		134 (Fluorescent, P - 2)	0.283333	0.348485	0.6875	0.3	0.348485	1.11979	0	0.0416667	0.484375	0	0.104167	1.71354	0	0	0	0	0	0
		135 (LED, B0 - P0)	0.216667	0.288889	0.7	0.3	0.433333	1.21667	0.111111	0.333333	0.469697	0.111111	1	1.40152	0	0	0.05	0	0	0.05
		136 (LED, B - 5)	0.203125	0.270833	0.671875	0.203125	0.385417	1.125	0	0.0512821	0.227778	0	0.25641	0.955556	0	0	0.03125	0	0	0.03125
		137 (LED, B - 25)	0.265625	0.171875	0.708333	0.296875	0.234375	1.08333	0	0	0.148148	0	0	0.731481	0	0	0	0	0	0
		138 (LED, B - 50)	0.3125	0.192708	0.583333	0.34375	0.276042	0.921875	0	0.0384615	0.0892857	0	0.0384615	0.303571	0	0	0	0	0	0
		139 (LED, P - 0.5)	0.260417	0.395833	0.708333	0.260417	0.536458	1.18229	0	0.025641	0.355556	0	0.025641	1.34444	0	0	0.109375	0	0	0.125
		140 (LED, P - 1)	0.276042	0.285714	0.854167	0.291667	0.434524	1.36458	0	0.0555556	0.377778	0	0.144444	1.21111	0	0	0.03125	0	0	0.03125
		141 (LED, P - 2)	0.233333	0.220238	0.755208	0.233333	0.220238	1.22917	0	0	0.427083	0	0	1.58333	0	0	0.03125	0	0	0.03125
E9 (in vivo)	11	142 (LA0)	0.242188	0.455556	0.951613	0.242188	0.605556	1.82796	0.016129	0.337302	0.723118	0.0241935	1.64683	4.55376	0	0	0.0537634	0	0	0.0537634
		143 (LA5)	0.109375	0.561828	0.854167	0.119792	0.741935	1.6276	0.0446429	0.413043	0.764368	0.0892857	2.18841	4.40805	0	0	0.0494792	0	0	0.0494792
		144 (LA10)	0.125	0.427419	0.941667	0.125	0.543011	1.91667	0.0322581	0.386364	0.85	0.0806452	2.2803	5.36111	0	0	0.0333333	0	0	0.0333333
		145 (LA50)	0.140625	0.231183	0.872396	0.148438	0.247312	1.5651	0.0583333	0.223958	0.725806	0.133333	1	4.80914	0	0	0.03125	0	0	0.03125
		146 (LA100)	0.0403226	0.145833	0.789062	0.0403226	0.145833	1.26562	0.00925926	0.205882	0.625	0.0185185	0.656863	2.98333	0	0	0.046875	0	0	0.046875
		147 (LA250)	0.0178571	0.0416667	0.421875	0.0178571	0.0416667	0.533854	0	0	0.266667	0	0	1.52917	0	0	0.0078125	0	0	0.0078125
		148 (LA500)	0	0.0714286	0.138889	0	0.0714286	0.138889	0	0	0.0555556	0	0	0.0555556	0	0	0	0	0	0
E10 (in vivo)	12	149 (AC0)	0.075	0.323718	0.911111	0.0833333	0.346154	1.46667	0.0555556	0.388889	0.765432	0.12963	1.45556	4.05556	0	0	0.0333333	0	0	0.0333333
		150 (AC0.1)	0.0963542	0.454023	0.921875	0.0963542	0.491379	1.4349	0.0178571	0.293478	0.770115	0.0178571	1.20652	4.17529	0	0	0	0	0	0
		151 (AC0.5)	0.116667	0.389881	0.862903	0.127778	0.431548	1.18817	0	0	0.224138	0	0	0.336207	0	0	0	0	0	0
		152 (AC1.5)	0.15625	0.419753	0.940104	0.164062	0.429012	1.22917	0	0	0.145161	0	0	0.403226	0	0	0	0	0	0
		153 (VC50)	0.120968	0.284483	0.864583	0.120968	0.293103	1.22917	0.0714286	0.270833	0.830357	0.151786	0.791667	5.15179	0	0	0.0494792	0	0	0.0494792
		154 (VC100)	0.109375	0.264368	0.872396	0.109375	0.275862	1.20573	0.102778	0.25	0.747126	0.263889	0.852273	4.92241	0	0	0.0078125	0	0	0.0078125
		155 (VC200)	0.102151	0.228395	0.817204	0.102151	0.228395	1.19355	0.0833333	0.3	0.777778	0.148148	1.40556	4.65432	0	0	0	0	0	0
E11 (in vivo)	13	156 (SN0)	0.0714286	0.293478	0.944444	0.0714286	0.293478	1.56481	0.154167	0.551282	0.829365	0.354167	1.73077	6.69841	0	0	0.0709877	0	0	0.0709877
		157 (SN0.1)	0.09375	0.3	0.85	0.09375	0.3375	1.27667	0.183333	0.577381	0.878788	0.3875	2.50595	7.34091	0	0	0.0566667	0	0	0.0566667
		158 (SN0.5)	0.0576923	0.226852	0.95	0.0576923	0.25463	1.32667	0.0416667	0.461538	0.861111	0.0416667	1.69231	7.11111	0	0	0.0133333	0	0	0.0133333
		159 (SN1)	0.0659722	0.329365	0.91358	0.0659722	0.329365	1.31481	0	0.255208	0.753968	0	0.729167	4.35317	0	0	0.0679012	0	0	0.0679012
		160 (SN2)	0.03	0.254167	0.826923	0.03	0.270833	1.08333	0	0.125	0.689394	0	0.142857	4.0303	0	0	0.0416667	0	0	0.0416667
		161 (SN3)	0.0603448	0.361111	0.827778	0.0603448	0.361111	1.13889	0	0.215278	0.586806	0	1.51389	3.76736	0	0	0.0416667	0	0	0.0416667
		162 (SN5)	0.0258621	0.445652	0.764368	0.0258621	0.561594	1.16092	0.047619	0.104167	0.493056	0.0952381	0.270833	2.58333	0	0	0.0201149	0	0	0.0201149
E12 (in vivo)	14	163 (W30 - FR0)	0.701389	0.916667	0.972222	1.30556	1.60417	2.11806	0.291667	0.256944	0.395833	0.597222	0.868056	1.52083	0.402778	0.236111	0.291667	0.694444	0.256944	0.4375
		164 (W40 - FR0)	0.708333	0.787879	1	1.29167	1.18939	2.25694	0.25	0.361111	0.375	0.55	0.944444	1.975	0.458333	0.234848	0.354167	0.583333	0.280303	0.520833
		165 (W60 - FR0)	0.770833	0.95	0.979167	1.5	1.58333	2.27083	0.477273	0.408333	0.636364	1.40909	1.425	3.18182	0.645833	0.116667	0.229167	1.00694	0.116667	0.3125
		166 (W70 - FR0)	0.770833	0.969697	1	1.31944	1.7197	2.38889	0.4	0.479167	0.675	0.991667	1.47917	3.825	0.493056	0.234848	0.347222	0.826389	0.257576	0.493056
		167 (W40 - FR13.24)	0.743056	0.916667	1	1.43056	1.25	2.17361	0.386364	0.37037	0.378788	1.29545	0.898148	1.88636	0.430556	0.075	0.263889	0.8125	0.1	0.361111
		168 (W50 - FR13.24)	0.770833	0.69697	0.979167	1.47917	1.13636	2.27778	0.416667	0.483333	0.475	1	1.50833	1.94167	0.625	0.121212	0.291667	0.930556	0.121212	0.583333
		169 (W65 - FR13.24)	0.795455	0.841667	1	1.40909	1.20833	2.29545	0.386364	0.458333	0.431818	1.20455	1.68333	2.38636	0.5	0.258333	0.44697	0.909091	0.291667	0.69697
		170 (W80 - FR13.24)	0.673611	0.875	1	1.1875	1.47917	2.36806	0.256944	0.458333	0.541667	0.611111	1.54167	2.45833	0.465278	0.125	0.347222	0.888889	0.125	0.5
		NOTES
		Please note that supplemental boxplots indicate the median with a black dot and do not display the mean.
		Colors indicate relative values, with red the highest and green the lowest within a column (explant type).
		NA=No data
		BM= Basal medium
		indirect= Indirect shoot regeneration
		direct= Direct shoot regeneration
		BM19 - 1.5%= Basal medium19 - 1.5% sucrose
		BM19 - 2.0%= Basal medium19 - 2.0% sucrose
		BM19 - 2.5%= Basal medium19 - 2.5% sucrose
		BM19 - 3.0%= Basal medium19 - 3.0% sucrose
		BM23 - 1.5%= Basal medium23 - 1.5% sucrose
		BM23 - 2.0%= Basal medium23 - 2.0% sucrose
		BM23 - 2.5%= Basal medium23 - 2.5% sucrose
		BM23 - 3.0%= Basal medium23 - 3.0% sucrose
		D0, BM19, 2,4D - 0= basal medium19, 2,4-D 0.0mg/L
		D1, BM19, 2,4D - 0.01= basal medium19, 2,4-D 0.01mg/L
		D2, BM19, 2,4D - 0.05= basal medium19, 2,4-D 0.05mg/L
		D3, BM19, 2,4D - 0.1= basal medium19, 2,4-D 0.1mg/L
		D4, BM19, 2,4D - 0.5= basal medium19, 2,4-D 0.5mg/L
		N1, BM19, NAA - 0.1= basal medium19, NAA 0.1mg/L
		N2, BM19, NAA - 0.5= basal medium19, NAA 0.5mg/L
		N3, BM19, NAA - 1= basal medium19, NAA 1mg/L
		N4, BM19, NAA - 2= basal medium19, NAA 2mg/L
		D0, BM23, 2,4D - 0= basal medium23, 2,4-D 0.0mg/L
		D1, BM23, 2,4D - 0.01= basal medium23, 2,4-D 0.01 mg/L
		D2, BM23, 2,4D - 0.05= basal medium23, 2,4-D 0.05 mg/L
		D3, BM23, 2,4D - 0.1= basal medium23, 2,4-D 0.1mg/L
		D4, BM23, 2,4D - 0.5= basal medium23, 2,4-D 0.5mg/L
		N1, BM23, NAA - 0.1= basal medium23, NAA 0.1mg/L
		N2, BM23, NAA - 0.5= basal medium23, NAA 0.5mg/L
		N3, BM23, NAA - 1= basal medium23, NAA 1mg/L
		N4, BM23, NAA - 2= basal medium23, NAA 2mg/L
		DB1, BM19, 2,4D- 0.01/BAP - 0.5= basal medium19, 2,4-D 0.01mg/L, BAP 0.5mg/L
		DB2, BM19, 2,4D - 0.05/BAP - 0.5= basal medium19, 2,4-D 0.05mg/L, BAP 0.5mg/L
		DB3, BM19, 2,4D - 0.1/BAP - 0.5= basal medium19, 2,4-D 0.1mg/L, BAP 0.5mg/L
		DB4, BM19, 2,4D - 0.01/BAP - 1= basal medium19, 2,4-D 0.01mg/L, BAP 1mg/L
		DB5, BM19, 2,4D - 0.05/BAP - 1= basal medium19, 2,4-D 0.05mg/L, BAP 1mg/L
		DB6, BM19, 2,4D - 0.1/BAP - 1= basal medium19, 2,4-D 0.1mg/L, BAP 1mg/L
		DK1, BM19, 2,4D - 0.01/KIN - 0.5= basal medium19, 2,4-D 0.01mg/L, KIN 0.5mg/L
		DK2, BM19, 2,4D - 0.05/KIN - 0.5= basal medium19, 2,4-D 0.05mg/L, KIN 0.5mg/L
		DK3, BM19, 2,4D - 0.1/KIN - 0.5 = basal medium19, 2,4-D 0.1mg/L, KIN 0.5mg/L
		DK4, BM19, 2,4D - 0.01/KIN - 1= basal medium19, 2,4-D 0.01mg/L, KIN 1mg/L
		DK5, BM19, 2,4D - 0.05/KIN - 1= basal medium19, 2,4-D 0.05mg/L, KIN 1mg/L
		DK6, BM19, 2,4D - 0.1/KIN - 1= basal medium19, 2,4-D 0.1mg/L, KIN 1mg/L
		DP1, BM19, 2,4D - 0.01/2IP - 0.5= basal medium19, 2,4-D 0.01mg/L, 2IP 0.5mg/L
		DP2, BM19, 2,4D - 0.05/2IP - 0.5= basal medium19, 2,4-D 0.05mg/L, 2IP 0.5mg/L
		DP3, BM19, 2,4D - 0.1/2IP - 0.5= basal medium19, 2,4-D 0.1mg/L, 2IP 0.5mg/L
		DP4, BM19, 2,4D - 0.01/2IP - 1= basal medium19, 2,4-D 0.01mg/L, 2IP 1mg/L
		DP5, BM19, 2,4D - 0.05/2IP - 1= basal medium19, 2,4-D 0.05mg/L, 2IP 1mg/L
		DP6, BM19, 2,4D - 0.1/2IP - 1= basal medium19, 2,4-D 0.1mg/L, 2IP 1mg/L
		NB1, BM19, NAA - 0.5/BAP - 0.5= basal medium19, NAA 0.5mg/L, BAP 0.5mg/L
		NB2, BM19, NAA - 1/BAP - 0.5= basal medium19, NAA 1mg/L, BAP 0.5mg/L
		NB3, BM19, NAA - 2/BAP - 0.5= basal medium19, NAA 2mg/L, BAP 0.5mg/L
		NB4, BM19, NAA - 0.5/BAP - 1= basal medium19, NAA 0.5mg/L, BAP 1mg/L
		NB5, BM19, NAA - 1/BAP - 1= basal medium19, NAA 1mg/L, BAP 1mg/L
		NB6, BM19, NAA - 2/BAP - 1= basal medium19, NAA 2mg/L, BAP 1mg/L
		NK1, BM19, NAA - 0.5/KIN - 0.5= basal medium19, NAA 0.5mg/L, KIN 0.5mg/L
		NK2, BM19, NAA - 1/KIN - 0.5= basal medium19, NAA 1mg/L, KIN 0.5mg/L
		NK3, BM19, NAA - 2/KIN - 0.5= basal medium19, NAA 2mg/L, KIN 0.5mg/L
		NK4, BM19, NAA - 0.5/KIN - 1= basal medium19, NAA 0.5mg/L, KIN 1mg/L
		NK5, BM19, NAA - 1/KIN - 1= basal medium19, NAA 1mg/L, KIN 1mg/L
		NK6, BM19, NAA - 2/KIN - 1= basal medium19, NAA 2mg/L, KIN 1mg/L
		NP1, BM19, NAA - 0.5/2IP - 0.5= basal medium19, NAA 0.5mg/L, 2IP 0.5mg/L
		NP2, BM19, NAA - 1/2IP - 0.5= basal medium19, NAA 1mg/L, 2IP 0.5mg/L
		NP3, BM19, NAA - 2/2IP - 0.5= basal medium19, NAA 2mg/L, 2IP 0.5mg/L
		NP4, BM19, NAA - 0.5/2IP - 1= basal medium19, NAA 0.5mg/L, 2IP 1mg/L
		NP5, BM19, NAA - 1/2IP - 1= basal medium19, NAA 1mg/L, 2IP 1mg/L
		NP6, BM19, NAA - 2/2IP - 1= basal medium19, NAA 2mg/L, 2IP 1mg/L
		M0= Melatonin 0µM
		M50= Melatonin 50µM
		M100= Melatonin 100µM
		M200= Melatonin 200µM
		S50= Serotonin 50µM
		S100= Serotonin 100µM
		S200= Serotonin 200µM
		M100 - S100= Melatonin 100µM - Serotonin 100µM
		Fluorescent, B0 - P0= benomyl 0mg/L - PPM 0ml/L
		Fluorescent, B - 5= benomyl 5mg/L
		Fluorescent, B - 25= benomyl 25mg/L
		Fluorescent, B - 50= benomyl 50mg/L
		Fluorescent, P - 0.5= PPM 0.5ml/L
		Fluorescent, P - 1= PPM 1ml/L
		Fluorescent, P - 2= PPM 2ml/L
		LED, B0 - P0= benomyl 0mg/L - PPM 0ml/L
		LED, B - 5= benomyl 5mg/L
		LED, B - 25= benomyl 25mg/L
		LED, B - 50= benomyl 50mg/L
		LED, P - 0.5= PPM 0.5ml/L
		LED, P - 1= PPM 1ml/L
		LED, P - 2= PPM 2ml/L
		LA0= Lipoic acid 0µM
		LA5= Lipoic acid 5µM
		LA10= Lipoic acid 10µM
		LA50= Lipoic acid 50µM
		LA100= Lipoic acid 100µM
		LA250= Lipoic acid 250µM
		LA500= Lipoic acid 500µM
		AC0= Activated charcoal 0g/L
		AC0.1= Activated charcoal 0.1g/L
		AC0.5= Activated charcoal 0.5g/L
		AC1.5= Activated charcoal 1.5g/L
		VC50= Ascorbic acid 50mg/L
		VC100= Ascorbic acid 100mg/L
		VC200= Ascorbic acid 200mg/L
		SN0= Siver nitrate 0mg/L
		SN0.1= Siver nitrate 0.1mg/L
		SN0.5= Siver nitrate 0.5mg/L
		SN1= Siver nitrate 1mg/L
		SN2= Siver nitrate 2mg/L
		SN3= Siver nitrate 3mg/L
		SN5= Siver nitrate 5mg/L
		W30 - FR0= White light 30µmol m-2 s-1 - Far red 0µmol m-2 s-1
		W40 - FR0= White light 40µmol m-2 s-1 - Far red 0µmol m-2 s-1
		W60 - FR0= White light 60µmol m-2 s-1 - Far red 0µmol m-2 s-1
		W70 - FR0= White light 70µmol m-2 s-1 - Far red 0µmol m-2 s-1
		W40 - FR13.24= White light 40µmol m-2 s-1 - Far red 13.24µmol m-2 s-1
		W50 - FR13.24= White light 50µmol m-2 s-1 - Far red 13.24µmol m-2 s-1
		W65 - FR13.24= White light 65µmol m-2 s-1 - Far red 13.24µmol m-2 s-1
		W80 - FR13.24= White light 80µmol m-2 s-1 - Far red 13.24µmol m-2 s-1
